# Supplementary material for: Golf and Health, More than 18 Holes—A Bibliometric Analysis
Source: MDPI journal article supplement (doi:10.3390/healthcare10071322), 2022-07-16
Supplement: s1 [file s1]

**Table.** Authors by numbers of publications WoS and Scopus.

| R  | Author Scopus      | Afiliation Scopus                       | Author WoS            | Afiliation WoS                            | hi W | N.A. WoS | C   | W | TC/Art WoS | First/Last WoS |
|----|--------------------|-----------------------------------------|-----------------------|-------------------------------------------|------|----------|-----|---|------------|----------------|
| 1  | Murray, Andrew     | Uni. of Edimburgh (UK)                  | Murray, Andrew        | Uni. of Edimburgh (UK)                    | 14   | 4        | 6   |   | 1,50       | 2020/2021      |
| 2  | Bauer, Iris        | Eberhard Karls Uni. of Tuingen (DEU)    | Bauer, Iris           | Eberhard Karls Uni. of Tuingen (DEU)      | 12   | 3        | 20  |   | 6,67       | 1998/2003      |
| 3  | Bauer, Ulrich      | Univ Appl Sci Berlin HTW (DEU)          | Bauer, Ulrich         | Univ Appl Sci Berlin HTW (DEU)            | 25   | 3        | 20  |   | 6,67       | 1998/2003      |
| 4  | Buckley, Jonathan  | Uni. of South Australia (AU)            | Robinson, Patrick     | Univ. Of London                           | 14   | 3        | 5   |   | 1,67       | 2020/2021      |
| 5  | Cameron, P.A.      | Monash Uni. Melbourne, Australia        | Benes, Ksenija        | Royal Wolverhampton NHS Trust (UK)        | 4    | 2        | 20  |   | 10,00      | 1998/2000      |
| 6  | Fradkin, A.J.      | Bloomsburg Uni., Bloomsburg, USA        | Breitbarth, T         | Swinburne Uni. of Technology (AU)         | 4    | 2        | 55  |   | 27,50      | 2019/2020      |
| 7  | Gabbe, B.J.        | Monash Uni. Melbourne, AU               | Buckley, Jonathan     | Uni. of South Australia (AU)              | 57   | 2        | 27  |   | 13,50      | 2016/2020      |
| 8  | Hawkes, Roger      | British Assoc Sport & Exercise Med (UK) | Bum, Chul-Ho          | Kyung Hee University                      | 4    | 2        | 74  |   | 37,00      | 2020/2021      |
| 9  | Hui-Chan, C.W.Y.   | Uni. of Illinois at Chicago, USA        | Carless, David        | University of Edimburgh (UK)              | 18   | 2        | 113 |   | 56,50      | 2009/2010      |
| 10 | Mosewich, Amber D. | Uni. of Alberta (Canada)                | Choi, Chulwan         | Gachon University                         | 4    | 2        | 74  |   | 37,00      | 2020/2021      |
| 11 | Mutrie, N.         | The Uni. of Edinburgh, UK               | Close, Graeme         | Liverpool John Moores University          | 4    | 2        | 33  |   | 16,50      | 2021           |
| 12 | Robinson, P.G.     | Royal Infirmary of Edinburgh, UK        | Courneya, Kerry       | University of Alberta                     | 88   | 2        | 23  |   | 11,50      | 2013           |
| 13 | Tsang, W.W.N.      | Hong Kong Metropolitan Uni.             | Douglas, Kitrina      | Leeds Beckett University                  | 16   | 2        | 114 |   | 57,00      | 2009/2010      |
| 14 | Unverdormen, Mrtin | Daiichi Sakyo                           | Evenson, Kelly        | University of North Carolina (USA)        | 71   | 2        | 5   |   | 2,50       | 2019/2020      |
| 15 | Archibald          | Uni. of Dundee, Dundee, UK              | Freeman, Paul         | University of Essex                       | 19   | 2        | 56  |   | 28,00      | 2010/2021      |
| 16 | Benes, Ksenija     | Royal Wolverhampton NHS Trust (UK)      | Hawkes, Roger         | British Assoc Sport & Exercise Med (UK)   | 10   | 2        | 5   |   | 2,50       | 2020/2020      |
| 17 | Breitbarth         | Swinburne Uni. of Technology (AU)       | Huth, Christop.       | Bundeswehr Uni. Munich (Germany)          | 5    | 2        | 55  |   | 27,50      | 2019/2020      |
| 18 | Bum, Chul-Ho       | Kyung Hee Uni.                          | Kinane, Denis         | University of Bern                        | 60   | 2        | 32  |   | 16,00      | 2021           |
| 19 | Choi, Chulwan      | Gachon Uni.                             | Kolb, Meike           | University of Munster                     | 5    | 2        | 16  |   | 8,00       | 2000/2003      |
| 20 | Close, Graeme      | Liverpool John Moores Uni.              | Meron, Dafna          | Western Sydney University (Australia)     | 32   | 2        | 95  |   | 47,50      | 2012/2014      |
| 21 | Courneya, Kerry    | Uni. of Alberta                         | Mosewich, Amber D.    | University of Alberta (Canada)            | 11   | 2        | 27  |   | 13,50      | 2016/2020      |
| 22 | Evenson, Kelly     | Uni.of North Carolina (USA)             | Nowacki, PE           | Justus Liebig Uni. Giessen (DEU)          | 8    | 2        | 16  |   | 8,00       | 2000/2003      |
| 23 | Grant, Liz         | The Uni. of Edinburgh, U K              | Porter, Anna K        | University of North Carolina (USA)        | 4    | 2        | 5   |   | 2,50       | 2019/2020      |
| 24 | Huth, Christop     | Bundeswehr Uni. Munich (DEU)            | Stenner, Brad J.      | University of South Australia (Australia) | 3    | 2        | 27  |   | 13,50      | 2016/2020      |
| 25 | Kelly, Paul        | The University of Edinburgh, UK         | Stude, Davd E.        | SW Chiropract LLC (USA)                   | 4    | 2        | 6   |   | 3,00       | 2001/2008      |
| 26 | Kinane, Denis      | University of Bern                      | Unverdormen           | Daiichi Sakyo                             | 17   | 2        | 43  |   | 21,50      | 1998/2003      |
| 27 | Kolb, Meike        | University of Munster                   | Vallbracht, Christian | Herz & Kreislaufzentrum (Germany)         | 17   | 2        | 20  |   | 10,00      | 1998/2000      |

R: Ranking; hi W: Hirsch index WoS; N.A.W: Number of citations; CW: Number of citations WoS; TC/Art W: Total citations per Article WoS.
